# Supplementary material for: A systematic review and functional bioinformatics analysis of genes associated with Crohn’s disease identify more than 120 related genes
Source: BMC Genomics. 2022 Apr 13;23:302. doi: 10.1186/s12864-022-08491-y (PMC9008988; doi:10.1186/s12864-022-08491-y)
Supplement: Supplementary file 7 — Additional file 7: Table S4. Mutations of associated to genes not annotated in other databases. [file 12864_2022_8491_MOESM7_ESM.xlsx]

## Sheet: Table S3 Annotation of mutation
Genes without Clinvar registration for Crohn/IBDs	Mutation	Transcript	Mutation label	Type	Suggested Consequence
TLR4	Asp299Gly	NP_003257	Asp299Gly	Polymorphism	Pathogenic
IL1B	rs16944	NG_008851.1	IL1B-511C/T	Polymorphism	Pathogenic
TNFSF15	-358T/C	NM_005118.3	719A>G	Polymorphism	Pathogenic
NOD1	rs6958571	NG_013025	ND1+32656	Indel	Pathogenic
DLG5	rs1248696	NM_004747	113G/A; R30Q	Polymorphism	Pathogenic
IL1RN	rs2234663	NM_173841.2:c.	rs2234663	Polymorphism	Pathogenic
NFKB1	rs28362491	NG_050628	NFKB1 _94ins/del	indel	Pathogenic
STAT3	rs1053004	NG_007370.1	63985C>A	Polymorphism	Pathogenic
CD14	-159T/C	NG_023178	371T/C	Polymorphism	Pathogenic
KRAS	c.35G>A	NM_004985.4	35G>A	Polymorphism	Pathogenic
IL12B	rs6887695	NC_000005.10	1188A>C	Polymorphism	Pathogenic
PTPN22	rs 2476601	NM_001193431	1858 C/T, R260W	Polymorphism	Pathogenic
MEFV	E148Q	NP_000234.1	E148Q	Polymorphism	Pathogenic
IL4	rs2243250	NG_023252	-590C/T	Polymorphism	Pathogenic
CCR5	delta32	NM_000579.3	delta32	Deletion	Pathogenic
TLR9	rs5743836	NG_033933	-1237T/C	Polymorphism	Pathogenic
NLRP3	Q705K	NP_001073289.1	Q705K	Polymorphism	Pathogenic
ICAM1	K469E	NP_000192	K469E	Polymorphism	Pathogenic
NKX2-3	rs10883365	NG_016854.1	rs10883365	Polymorphism	Pathogenic
IFNG	rs1861494	NG_015840	IFNG +2109	Polymorphism	Pathogenic
IL23A	rs11209026	XP_011536779.1	p.Arg381Gln	Polymorphism	Pathogenic
TNFRSF1A	TNFRSF1A +36	NG_007506	339A/G	Polymorphism	Protective?
PTPN2	rs1893217	NM_002828.4	rs1893217	Polymorphism	Pathogenic
NCF4	rs13361189	NT_029289.12	150843825T>C	Polymorphism	Pathogenic
TLR5	rs5744168	NM_003268	1815C/T	Polymorphism	Protective
IL18	rs187238	NG_028143	-137 G>C	Polymorphism	Pathogenic
JAK2	rs10758669	NT_008413.19	4981602C>A	Polymorphism	Pathogenic
SLC11A1	823C/T	NM_000578	1087C/T	Polymorphism	Pathogenic
NAT2	8p22	NM_000015.2	8p22	Polymorphism	Pathogenic
MYO9B	rs1545620	NP_001123537	Ala1011Ser	Polymorphism	Pathogenic
ULK1	rs12303764	NM_003565.3	rs12303764	Polymorphism	Pathogenic
PPARG	rs1801282	NP_001341597.1	Pro12Ala	Polymorphism	Protective
GSTT1	GSTT1-null	NT_187633.1	GSTT1-null	Deletion	Pathogenic
MST1	rs3197999 (Arg689Cys)	NP_066278.3	Arg689Cys	Polymorphism	Pathogenic
TNFRSF1B	TNFRSF1B +196	NM_001066.2	+196T/G	Polymorphism	Pathogenic
NFKBIA	rs2273650	NM_020529.	rs2273650	Polymorphism	Pathogenic
DEFB1	rs11362	NM_005218.3	G-20A	Polymorphism	Pathogenic
CX3CR1	T280M	NM_001171171.1	839C>U	Polymorphism	Pathogenic
ZNF365	rs7076156	NM_199452.3	518G>A Ala62Thr	Polymorphism	Pathogenic
HNF4A	rs1884613	NT_011362.11	44351775C>G	Polymorphism	Pathogenic
MIF	-173G>C	NM_002415.1	-173G>C	Polymorphism	Pathogenic
BTNL2	rs28362680	NM_001304561.1	612 C>T	Polymorphism	Pathogenic
TLR1	rs4833095	NM_003263.3	743A>G	Polymorphism	Pathogenic
ERAP2	rs30187	NM_001349244.1	Arg528Lys	Polymorphism	Pathogenic
CCR2	V64I	NP_001116513.2	V64I	Polymorphism	Pathogenic
CSF1R	A2033T	NG_012303.1	A2033T	Polymorphism	Pathogenic
IL27	rs153109	NM_145659.3	-964A>G	Polymorphism	Pathogenic
TLR6	S249P	NP_006059	S249P	Polymorphism	Pathogenic
IL4R	-590 T allele	NC_000016.10	-590 T allele	Polymorphism	Pathogenic
APOE	_2 isoprotein	NP_001289619	_2 isoprotein	Polymorphism	Pathogenic
PTGS2	-765G_C (rs20417)	NM_000963.4	-765G_C (rs20417)	Polymorphism	Pathogenic
IL16	295T-to-C promoter polymorphism		295T-to-C promoter polymorphism	Polymorphism	Pathogenic
NCF2	c.113 G_A (p67phox R38Q)	NP_000424	R38Q	Polymorphism	Pathogenic
IRF1	rs11242115	NM_001354924.1	rs11242115	Polymorphism	Pathogenic
CARD9	rs200735402	NP_434700.2	rs200735402	Polymorphism	Pathogenic
TCN2	rs1801198	NP_001171655.1	rs1801198	Polymorphism	Pathogenic
CD24	C170T (rs52812045)	NG_006012.6	rs52812045	Polymorphism	Pathogenic
DMBT1	rs2981804	NM_004406	rs2981804	Polymorphism	Pathogenic
CFTR	DeltaF508		DeltaF508	Polymorphism	Pathogenic
CLEC2D	rs3764022	NP_037401.1	rs3764022	Polymorphism	Pathogenic
HLA-G	14-bp Del/Ins polymorphism in the 3_-untranslated region of HLA-G (rs66554220)	----	rs66554220	Indel	Pathogenic
MTRR	I22M	NP_002445.2	rs1801394	Polymorphism	Pathogenic
ORMDL3	rs2872507	NC_000017.11	rs2872507	Polymorphism	Pathogenic
NOS2	S608L	NP_000616	S608L	Polymorphism	Pathogenic
MUC2	V116M	NP_002448.4	V116M	Mutation	Pathogenic
TNFAIP3	rs2230926 (F127C)	NP_006281	F127C	Polymorphism	Pathogenic
BPI	Lys216Glu	NP_001716.2	K216E	Polymorphism	Pathogenic
CD40LG	rs2427870	NC_000023.11	rs2427870	Polymorphism	Pathogenic
CREM	rs1148247	NM_001267562	rs1148247	Polymorphism	Pathogenic
CSF2RB	p.S709LX22	NP_000386.1	p.S709fs	Polymorphism	Pathogenic
ACE	rs4343 (exon 16, A11860G)	NM_000789	rs4343	Polymorphism	Pathogenic
KRT8:keratin 8	K8(G62C)	NP_001243222.1	G62C	Polymorphism	Pathogenic
HNRNPD	p.D300V	NP_112737.1	p.D300V	Polymorphism	Pathogenic
FAS:Apo1	-670 A/G	NM_000043	-670 A/G	Polymorphism	Pathogenic
KCNN4	rs2306801	NG_052672.1	rs2306801	Polymorphism	Pathogenic
MUC3A	2557T	AB038784.1	853Y	Polymorphism	Pathogenic
CXCL16	rs2277680	NP_001094282.1	rs2277680	SNV	Pathogenic
TIMP1:TIMP-1(4)	+372 T/C	NC_000022	+372 T/C	Polymorphism	Pathogenic
SLC22A1:organic cation transporter 1	rs1050152	NP_003050.2	L503F	Polymorphism	Pathogenic
ATG16L2	rs11235604	NP_203746.1	rs11235604	SNV	Pathogenic
PTEN	R142Q	NP_000305	R142Q	Polymorphism	Pathogenic
SFTPD	rs2243639	NM_003019	rs2243639	Polymorphism	Pathogenic
EPX	EPX405 G > C (rs2013109)	NC_000014.9	EPX405 G > C (rs2013109)	Polymorphism	Pathogenic
CXCR4	rs2228014	NM_001008540.2	rs2228014	Polymorphism	Pathogenic
REEP6:DP1L1(8)	C996A	NG_055254	C996A	Polymorphism	Pathogenic
SMAD3	Ala382Val	NP_005893	Ala382Val	Polymorphism	Pathogenic
AGER:RAGE(2)	rs2070600	NP_001127.1	G82S	Polymorphism	Protective
MLN:motilin	A 115 V	NP_001035198	A15V	Polymorphism	Pathogenic
CYP2A6	rs3733829	NC_000019.10		Polymorphism	Pathogenic
HLA-DQA2	rs3208181	NP_064440.1	rs3208181	Polymorphism	Pathogenic
TNFSF8	rs3181374	NM_001252290	rs3181374	Polymorphism	Pathogenic
BDKRB1:B1 receptor	G-699-->C	NC_000014.9	G-699-->C	Polymorphism	Protective
TRAIP	rs1128535	NM_00587	rs1128535	Polymorphism	Pathogenic
IFNA4	c.60 A	NP_066546.1	rs113055208	Polymorphism	Pathogenic
IFNA10	c.60 T > A	NP_002162.1	rs10119910	Polymorphism	Pathogenic
DNAH12	rs4462937	NP_001278590.1	rs4462937	Polymorphism	Pathogenic
SLCO3A1	rs207959	NM_001145044	rs207959	Polymorphism	Pathogenic
POU5F1	rs3130501	NT_007592.16	rs3130501	Polymorphism	Pathogenic
DUOX2	P303R	NP_001350640	P303R	Polymorphism	Pathogenic
MAP3K8	rs1042058	NM_001244134	rs1042058	Polymorphism	Pathogenic
SLC39A8	rs13107325	NP_07143	ala391threonine	Polymorphism	Pathogenic
MAGI3	rs1343126	NT_032977.10	rs1343126	Polymorphism	Pathogenic
GC:vitamin D-binding protein	420 (ACG>AAG; Thr>Lys)	NP_000574	Thr420Lys	Polymorphism	Pathogenic
SLC15A1	Ser117Asn	NP_005064	Ser117Asn	Polymorphism	Pathogenic
UCP2	-866 G/A	AF208500	-866 G/A	Polymorphism	Protective
CALCOCO2	Val248Ala	NP_005822.1	Val248Ala	Polymorphism	Pathogenic
DLG1	I125T	NP_001091894.1	I125T	Polymorphism	Pathogenic
