# Supplementary material for: A systematic review and functional bioinformatics analysis of genes associated with Crohn’s disease identify more than 120 related genes
Source: BMC Genomics. 2022 Apr 13;23:302. doi: 10.1186/s12864-022-08491-y (PMC9008988; doi:10.1186/s12864-022-08491-y)
Supplement: Supplementary file 8 — Additional file 8: Table S5. Annotation for genes categorized as other genetic associations. [file 12864_2022_8491_MOESM8_ESM.xlsx]

## Sheet: Table S4 Other genetic alterati
Gen	Pubmed ID	Mutation	Transcript	Mutation Label	Position pb	Gene distance pb		Nearest gene pb
CCR6	24662057	rs1819333	NC_000006.12	g.166960059T>G	166960059	151748		167111807
CCNY	21830272	rs17582416	NC_000010.11	g.34998722T>G	34998722	248259		35246981
PSMG1	21830272	rs2836878	NC_000021.9	g.39093608G>A	39093608	81838		39175446
STAT5A	26278503	rs7220367	NC_000017.11	g.42283095C>G	42283095	4452		42287547
UBE2L3	22592522	rs2298428	NC_000022.11	g.21628603C>T	21628603	4569		21624034
EP300	22936669	rs4820425	NC_000022.11	g.41035338C>A	41035338	57248		41092586
USP25	25489960	rs2823256	NC_000021.9	g.15412387G>A	15412387	317547		15729934
RNF186	23511034	rs4654903	NC_000001.11	g.19874497A>C	19874497	59219		19815278
AIF1	22936669	rs9348876	NT_167249.2	g.2906788C>G	31607499	7710		31615209
C11orf30	1830272	rs7927894	NC_000011.10	g.76590272C>T	76590272	37241		76553031
FOXP2	22936669	rs1869839	NC_000007.14	g.114717488A>G	114717488	631178		114086310
IL33	23634226	rs3939286	NC_000009.12	g.6210099T>C	6210099	4492		6214591
CDKN2B-AS1	29063720	rs3731257	NC_000009.12	g.21966222G>A	21966222	1530		21967752
PRG3	22412388	rs11229030	NC_000011.10	g.57435536C>T	57435536	54386		57381150
MMD2	20570966	rs4720435	NC_000007.14	g.4872767G>T	4872767	19478		4892245
CADM1	20570966	rs2513676	NC_000011.10	g.115129153A>G	115129153	40083		115169236
PRG2	22412388	rs11229030	NC_000011.10	g.57435536C>T	57435536	44886		57390650
EXOC2	20570966	rs7768444	NC_000006.12	g.880234C>A	880234	187093		693141
RAP1A	30500874	rs488200	NC_000001.11	g.111720204A>T	111720204	3509		111716695
RPL7	22412388	rs12677663	NC_000008.11	g.73095112G>T	73095112	195130		73290242
CCL7	20570966	rs991804	NC_000017.11	g.34260706C>T	34260706	9515		34270221
CLDN2	23946598	rs12014762	NG_016392.1	g.64805G>A	106940440	9579		106930861
ADAM30	23128233	rs3897478	NC_000001.11	g.119908567T+E24:E63>C	119908567	12052		119896515
AKAP1	26192919	rs9525625	NC_000013.11	g.42443894T>C	42443894	120628		42323266
AKAP11	28067908	rs80244186	NC_000013.11	g.42343725T>C	42343725	20459		42323266
C7orf72	28067908	rs1456896	NC_000007.14	g.50264865C>T	50264865	105609		50159256
CCL2	21102463	rs3091315	NC_000017.11	g.34266646A>G	34266646	9443		34257203
CNTNAP2	26192919	rs2538470	NC_000007.14	g.148523356A>G	148523356	102358		148420998
CPEB4	21102463	rs359457	NC_000005.10	g.173852839C>T	173852839	35489		173888328
FADS1	21102463	rs102275	NC_000011.10	g.61790331T>C	61790331	9296		61799627
FASLG	23128233	rs9286879	NC_000001.11	g.172893094A>G	172893094	226218		172666876
GSDMB	28067908	rs12946510	NC_000017.11	g.39756124C>T	39756124	148471		39904595
HLA-B	26891255	rs114985235	NC_000006.12	g.31301916T>C	31301916	51959		31353875
HLA-DQA1	26891255	rs9271060	NC_000006.12	g.32607736C>A	32607736	29670		32637406
HLA-DQB1	26891255	rs140068907	NC_000006.12	g.32691666A>C	32691666	25009		32666657
ICOSLG	21102463	rs2838519	NC_000021.9	g.44195140G>A	44195140	21839		44216979
IRF4	26192919	rs7773324	NC_000006.12	g.382559G>A	382559	9193		391752
ITGA4	28067908	rs6740847	NC_000002.12	g.181443625A>G	181443625	13267		181456892
KLF3	23850713	rs6856616	NC_000004.12	g.38323415T>C	38323415	340664		38664079
PDCD1	26192919	rs35320439	NC_000002.12	g.241797926T>C	241797926	51955		241849881
PRDM1	21102463	rs6568421	NC_000006.12	g.105987150A>G	105987150	59579		106046729
PRDX5	21102463	rs694739	NC_000011.10	g.64329761A>	64329761	7950		64321811
PSORS1C1	23128233	rs9264942	NC_000006.12	g.31306603T>C	31306603	166511		31140092
PTPRC	26192919	rs7555082	NC_000001.11	g.198629533G>A	198629533	9435		198638968
RASGRP1	23128233	rs16967103	NC_000015.10	g.38606989T>C	38606989	42175		38564814
RBX1	22936669	rs4820425	NC_000022.11	g.41035338C>A	41035338	62029		40973309
REL	21102463	rs10181042	NC_000002.12	g.60997124C>T	60997124	65512		60931612
RIPK2	23128233	rs7015630	NC_000008.11	g.89863690T>A	89863690	72626		89791064
RNASET2	23850713	rs2149085	NC_000006.12	g.166957622T>C	166957622	1042		166956580
SLC2A4RG	21102463	rs4809330	NC_000020.11	g.63718234A>G	63718234	21542		63739776
SMNDC1	23850713	rs11195128	NC_000010.11	g.110426390C>G	110426390	121421		110304969
SOX11	23266558	rs11894081	NC_000002.12	g.5523876G>T	5523876	168508		5692384
TAGAP	23128233	rs212388	NC_000006.12	g.159069404C>G	159069404	24252		159045152
TBC1D1	23266558	rs1487630	NC_000004.12	g.38334202C>T	38334202	195027		38139175
TCERG1L	22412388	rs10734105	NC_000010.11	g.131373856G>A	131373856	62135		131311721
TEF	26192919	rs727563	NC_000022.11	g.41471373C>T	41471373	72045		41399328
TNFSF11	21102463	rs2062305	NC_000013.11	g.42478744G>A	42478744	83992		42562736
TXK	23128233	rs6837335	NC_000004.12	g.48361966A>G	48361966	226644		48135322
UBE2D1	21102463	rs1819658	NC_000010.11	g.58153390C>G	58153390	181589		58334979
UCN	23128233	rs1728918	NC_000002.12	g.27412596A>G	27412596	104151		27308445
VAMP3	21102463	rs2797685	NC_000001.11	g.7819003C>T	7819003	37571		7781432
ZFP36L1	21102463	rs4902642	NC_000014.9	g.68743482G>A	68743482	44173		68787655
CEBPA	28067908	rs17694108	NC_000019.10	g.33240644G>A	33240645	33299934		59289
CSF2	22412388	rs3091338	NC_000005.10	g.132067044C>T	132067045	132073789		6744
CUL2	26192919	rs11010067	NC_000010.11	g.35006502C>G	35006503	35008551		2048
FCHSD2	23850713	rs11235667	NC_000011.10	g.73152651A>G	73152652	73142682		9970
FOS	26192919	rs1569328	NC_000014.9	g.75275047C>T	75275048	75278828		3780
IKZF1	26192919	rs1456896	NC_000007.14	g.50264864C>T	50264865	50303453		38588
IKZF3	26192919	rs12946510	NC_000017.11	g.39756123C>T	39756124	39757715		1591
IL1R1	26192919	rs10185424	NC_000002.12	g.102046426T>G	102046427	102069638		23211
IPMK	21102463	rs1819658	NC_000010.11	g.58153389C>G	58153390	58191517		38127
